# Supplementary material for: Fluorescence detection of 4-nitrophenol and α-glucosidase activity based on 4-nitrophenol-regulated fluorescence of silicon nanoparticles
Source: Royal Society of Chemistry journal article supplement (doi:10.1039/d3an00966a), 2023-01-01
Supplement: d3an00966a1.pdf [file d3an00966a1.pdf]

Fluorescent detection of 4-nitrophenol and  $\alpha$ -glucosidase activity  
based on 4-nitrophenol regulated fluorescence of silicon  
nanoparticles

Fangning Liu, Fan Liang, Zhe Li, Ge Kang, Tingting Wang, Chuanxia Chen\* and  
Yizhong Lu\*

School of Materials Science and Engineering, University of Jinan, Jinan, Shandong  
250022, China

\*E-mail: mse\_chencx@ujn.edu.cn, mse\_luyz@ujn.edu.cn

## **Chemicals and Materials.**

N-[3-(trimethoxysilyl)propyl]ethylenediamine (DAMO), *p*-aminophenol (AP), NPG, aspartic acid (Asp), 3-nitrophenol (3-NP), 2-nitrophenol (2-NP), Zn(NO<sub>3</sub>)<sub>2</sub>, NaCl, KCl, MgCl<sub>2</sub>, NH<sub>4</sub>Cl, NiCl<sub>2</sub>, Co(NO<sub>3</sub>)<sub>2</sub>, MnCl<sub>2</sub>, FeCl<sub>3</sub>, FeSO<sub>4</sub>, NaF, NaCl, NaBr, NaI, NaNO<sub>3</sub>, Na<sub>2</sub>CO<sub>3</sub>, Na<sub>2</sub>SO<sub>4</sub>, Na<sub>2</sub>SO<sub>3</sub>, disodium edetate dihydrate (Na<sub>2</sub>EDTA), aspartic acid (Asp) and histidine (His) were obtained from Aladdin Co. Ltd. (Shanghai, China).  $\alpha$ -glucosidase ( $\alpha$ -Glu), bovine serum albumin (BSA), glucose (Glu), catechol (Cchol), hydroquinone (HQ), benzoic acid (BA), phenol (Ph), resorcinol (Rsnol), 4-nitrophenol (4-NP), alkaline phosphatase (ALP), acetylcholinesterase (AChE), lysozyme (Lys), glucose oxidase (GOx), and trypsin were purchased from Sigma-Aldrich (St. Louis, MO). Pancreatin (Pan) and pepsin was bought from Macklin Biochemical Technology Co. Ltd. (Shanghai, China).

## **Apparatus and Characterization.**

Fluorescence spectra were recorded by a Shimadzu RF-6000 spectrofluorometer (Shimadzu, Japan). UV-vis spectra were acquired with a UV-8000 spectrophotometer (Metash, China). The morphology of Si NPs was characterized by using a Jeol JEM-2100 Plus transmission electron microscope (TEM, Japan) operated at 100 kV. X-ray photoelectron spectroscopy (XPS) study was carried out using the ESCALAB MK II spectrometer (VG Scientific) with Al K $\alpha$  radiation as X-ray source. X-ray powder diffraction (XRD) pattern was collected on D8 ADVANCE (Germany) using Cu K $\alpha$  radiation generated at 40 kV and 40 mA. Fourier transform infrared (FTIR) data were acquired with a VERTEX 70 Fourier transform infrared spectrometer (Bruker).

### **Synthesis of Si nanoparticles (Si NPs)**

Si NPs were synthesized according to our previous work<sup>1</sup>. Typically, 3.2 mL of DAMO and 1.2 mL of AP 10 mM solution were thoroughly mixed with 15.6 mL of ultrapure water, and then being incubated at 70 °C for 20 min. The resulted orange-red Si NPs were cooled to room temperature, purified with a dialysis bag (500 Da) against ultrapure water for 6 h, and then stored at 4 °C.

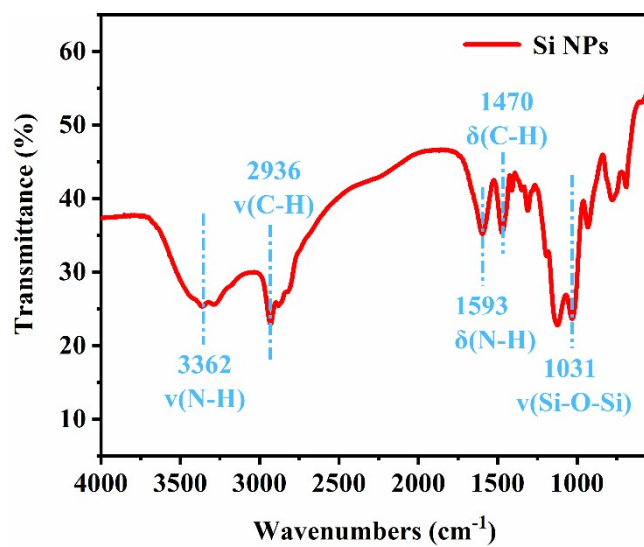

**Fig.S1** FT-IR spectrum of the Si NPs.

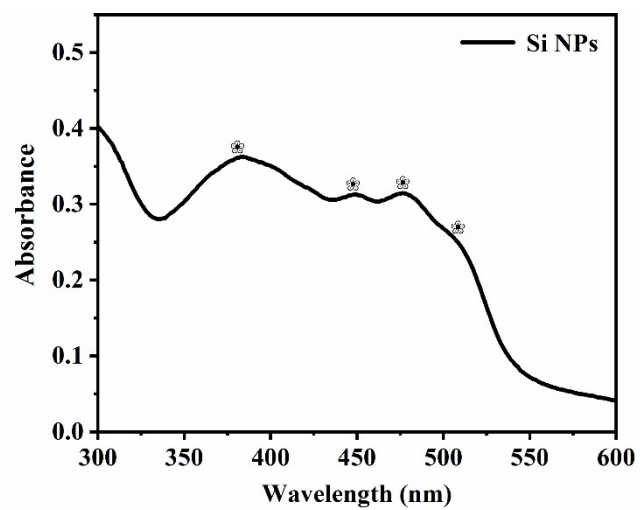

**Fig.S2** UV-Vis absorption spectrum of Si NPs.

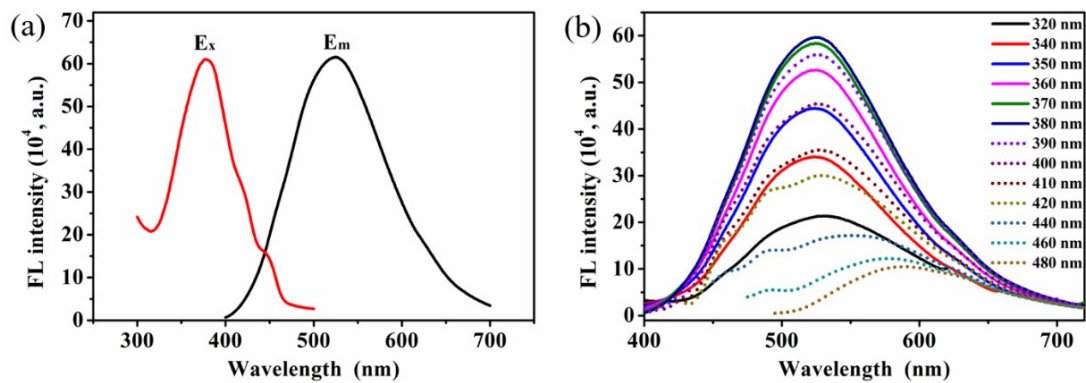

**Fig.S3** (a) Excitation fluorescence spectrum and emission fluorescence spectrum of Si NPs. (b) Emission spectra of Si NPs at different excitation wavelengths.

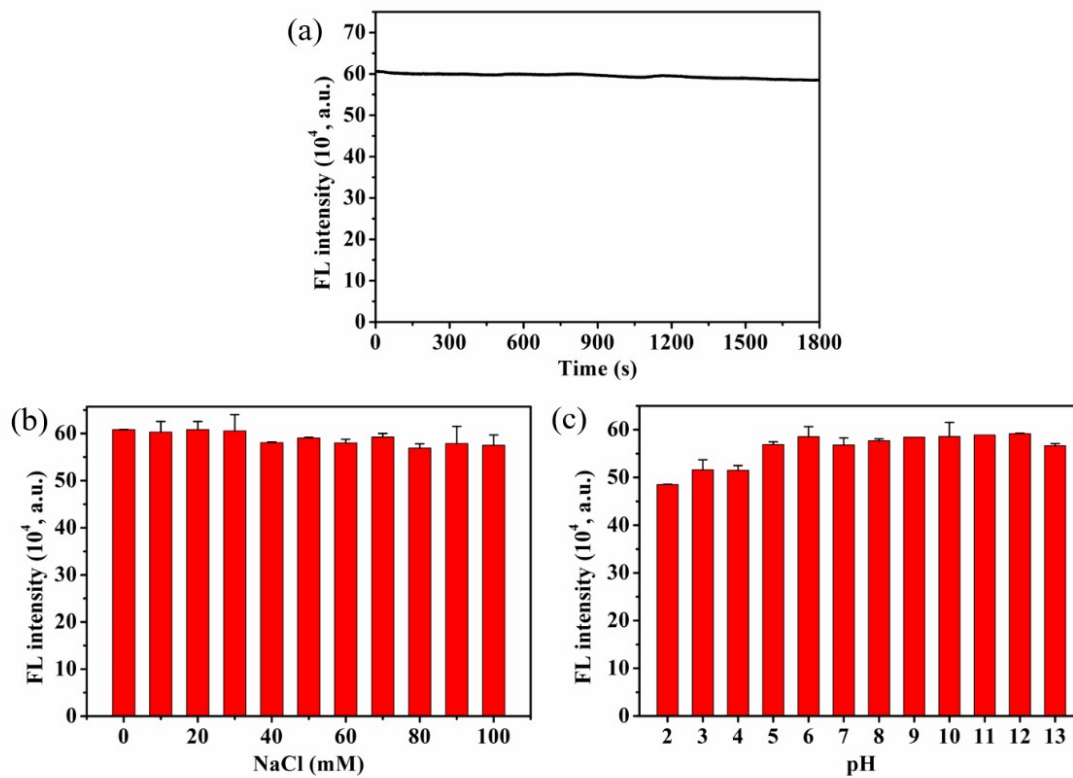

**Fig.S4** (a) Fluorescence intensity of Si NPs after irradiation for different times under 376 nm UV light. (b) Fluorescence intensity in the presence of different concentrations of NaCl. (c) Fluorescence intensity of Si NPs at different pH.

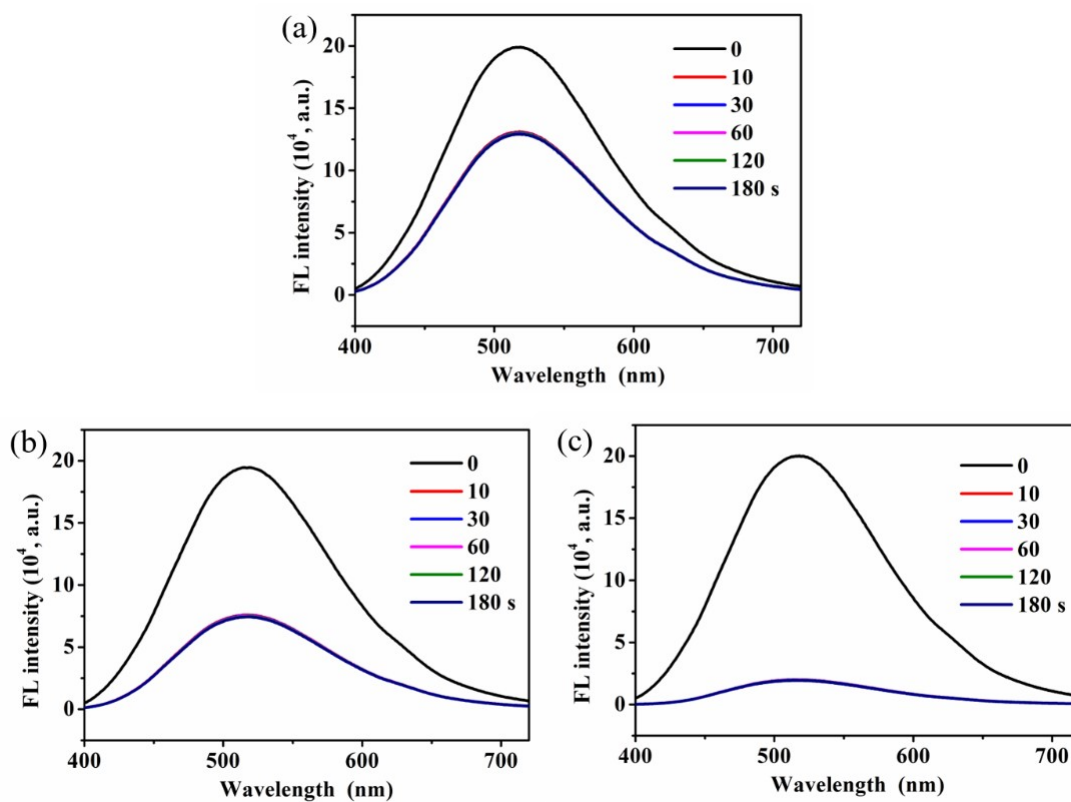

**Fig.S5** The fluorescence spectra of Si NPs after reacting with (a) 30, (b) 50 and (c) 150  $\mu$ M of 4-NP for different times.



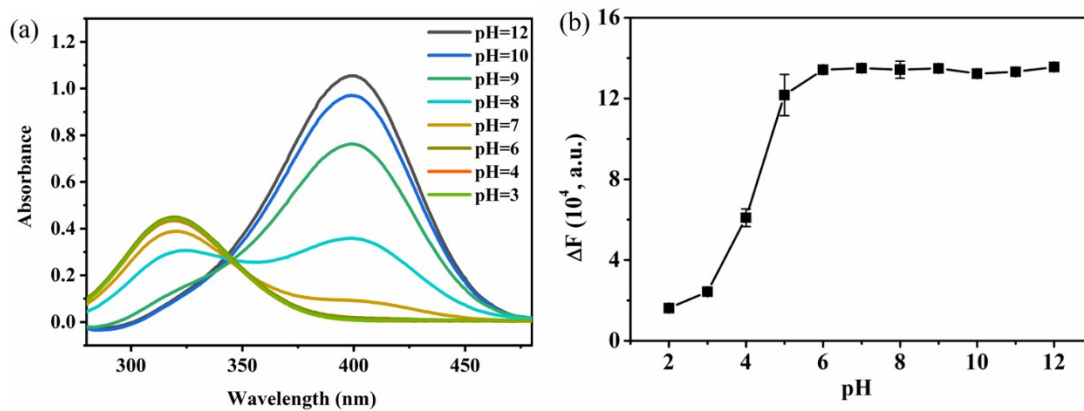

**Fig.S6** (a) UV-Vis absorption spectra of 4-NP and (b) fluorescence intensity change of Si NPs induce by 4-NP at different pH values.

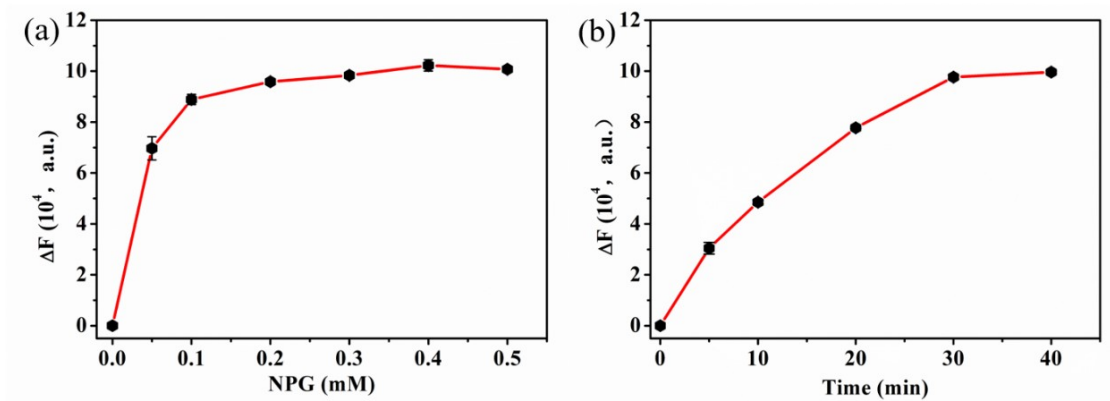

**Fig.S7** Relationship between the change of Si NPs fluorescence intensity and the concentration of (a) NPG in the system and (b) incubation time.

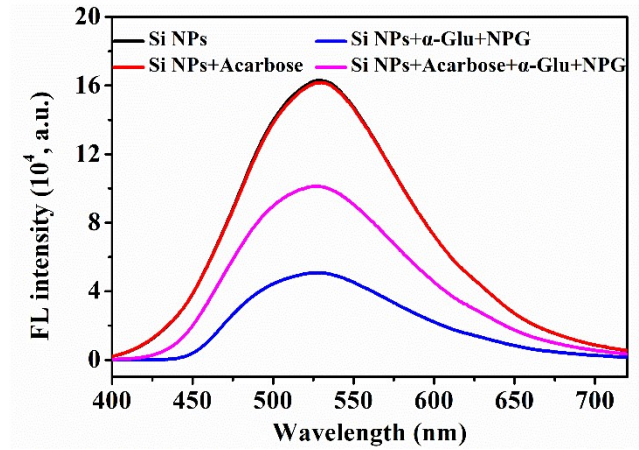

**Fig.S8** Fluorescent spectra of Si NPs in the presence of Acarbose,  $\alpha$ -Glu + NPG and Acarbose,  $\alpha$ -Glu + NPG.

**Table S1.** Comparison of the proposed method with other reported methods for 4-NP detection.

| Method           | Linear range<br>( $\mu\text{M}$ ) | LOD<br>( $\mu\text{M}$ ) | Detection<br>time (min) | Recovery (%) | Ref.      |
|------------------|-----------------------------------|--------------------------|-------------------------|--------------|-----------|
| Electrochemistry | 1.0–300                           | 0.6                      | 7                       | 95.9–104.4   | 2         |
| Electrochemistry | 0.1–120                           | 0.02                     | 30                      | 99.0–102.3   | 3         |
| Electrochemistry | 0.1–50                            | 0.01                     | 11                      | 97.4–100.6   | 4         |
| Fuel Cell        | 0.05–20                           | 0.031                    | 15                      | 96.0–108.2   | 5         |
| Colorimetry      | 0.005–1, 1–50                     | 0.0035                   | 1                       | 97.0–110.0   | 6         |
| Fluorescence     | 0.14–21                           | 0.064                    | –                       | 97.0–100.5   | 7         |
| Fluorescence     | 0.05–50                           | 0.009                    | 5                       | 97–105       | 8         |
| Fluorescence     | 0.5–14                            | 0.036                    | 9                       | 93.8–105.3   | 9         |
| Fluorescence     | 0.5–70                            | 0.201                    | 1                       | 98–106       | 10        |
| Fluorescence     | 0.2–8                             | 0.051                    | 8                       | 92.7–109.2   | 11        |
| Fluorescence     | 1–40                              | 0.34                     | 2                       | 98.1–106.3   | 12        |
| Fluorescence     | 0–12                              | 0.15                     | –                       | 94.6–106.3   | 13        |
| Fluorescence     | 0.05–5                            | 0.0138                   | 1                       | 99.4–100.2   | 14        |
| Fluorescence     | 0.5–60                            | 0.26                     | 1                       | 96.8–103.8   | 15        |
| Fluorescence     | 0.5–60                            | 0.074                    | immediately             | 98.4–103.8   | This work |

**Table S2.** Comparison of the proposed method with other reported methods for  $\alpha$ -Glu detection.

| Materials                     | Substrate         | Mode        | Linear range<br>(U mL <sup>-1</sup> ) | LODs<br>(mU mL <sup>-1</sup> ) | Ref.         |
|-------------------------------|-------------------|-------------|---------------------------------------|--------------------------------|--------------|
| $\beta$ -CD-CQDs              | NPGlu             | Fluorometry | 0.01–0.06                             | 0.6                            | 16           |
| CDs                           | NPGlu             | Fluorometry | 0.2–10                                | 10                             | 17           |
| SiQDs-MnO <sub>2</sub> NS     | AAG               | Fluorometry | 0.02–2.5                              | 7                              | 18           |
| PBA-CQD                       | NPGlu             | Fluorometry | 1.14–17.35                            | 0.33                           | 19           |
| MnO <sub>2</sub> NS-OPD-AuNCs | AAG               | Fluorometry | 0.2–8                                 | 30                             | 20           |
| F-PDA-CoOOH                   | AAG               | Fluorometry | 0.002–0.08                            | 1.65                           | 21           |
| CTAB-AuNRs                    | AAG               | Colorimetry | 0.0025–0.045                          | 0.5                            | 22           |
| pAPG-AuNPs                    | pAPG              | Colorimetry | 0.01–1.1                              | 4                              | 23           |
| AuNPs-I-Cys-GOx               | Maltose           | Colorimetry | 0.0025–0.5                            | 1                              | 24           |
| f-FeNC                        | NPGlu, etc        | Colorimetry | 0.005–0.04,<br>0.04–0.1               | 0.27                           | 25           |
| SA-Pt/CN                      | $\alpha$ -Arbutin | Colorimetry | 0.01–8                                | 3.8                            | 26           |
| Si NPs                        | NPGlu             | Fluorometry | 0.0005–0.06                           | 0.094                          | This<br>work |

## References

1. C. X. Chen, D. Zhao, B. Wang, P. j. Ni, Y. Y. Jiang, C. H. Zhang, F. Yang, Y. Z. Lu and J. Sun, *Anal. Chem.*, 2020, 92, 4639-4646.
2. H. Yin, Y. Zhou, S. Ai, X. Liu, L. Zhu and L. Lu, *Microchim. Acta*, 2010, 169, 87-92.
3. J. Li, D. Kuang, Y. Feng, F. Zhang, Z. Xu and M. Liu, *J. Hazard. Mater.*, 2012, 201, 250-259.
4. S. Gopi and K. Yun, *J. Environ. Chem. Eng.*, 2022, 10, 108938.
5. K. Yan, Y. Yang, Y. Zhu and J. Zhang, *Anal. Chem.*, 2017, 89, 8599-8603.
6. A. Nguyen Thi Ngoc and R.-A. Doong, *ACS Appl. Nano Mater.*, 2018, 1, 2153-2163.
7. Y. Zhou, Z.-B. Qu, Y. Zeng, T. Zhou and G. Shi, *Biosens. Bioelectron.*, 2014, 52, 317-323.
8. F. Amiripour, S. Ghasemi and S. N. Azizi, *Anal. Chim. Acta*, 2022, 1202, 339638.
9. X. Wei, Z. Zhou, T. Hao, H. Li, Y. Zhu, L. Gao and Y. Yan, *RSC Adv.*, 2015, 5, 44088-44095.
10. S. Liao, Z. Ding, S. Wang, F. Tan, Y. Ge, Y. Cui, N. Tan and H. Wang, *Spectrochim. Acta, Part A*, 2021, 259, 119897.
11. J. Yu, X. Wang, Q. Kang, J. Li, D. Shen and L. Chen, *Environ. Sci.-Nano*, 2017, 4, 493-502.
12. S. Geng, S. M. Lin, S. G. Liu, N. B. Li and H. Q. Luo, *RSC Adv.*, 2016, 6, 86061-86067.
13. W. Li, H. Zhang, S. Chen, Y. Liu, J. Zhuang and B. Lei, *Biosens. Bioelectron.*, 2016, 86, 706-713.
14. T. Shu, J. Wang, X. Lin, Z. Zhou, F. Liang, L. Su and X. Zhang, *J. Mater. Chem. C*, 2018, 6, 5033-5038.
15. L. Han, S. G. Liu, J. Y. Liang, Y. J. Ju, N. B. Li and H. Q. Luo, *J. Hazard. Mater.*, 2019, 362, 45-52.
16. C. Tang, Z. Qian, Y. Qian, Y. Huang, M. Zhao, H. Ao and H. Feng, *Sens. Actuators, B*, 2017, 245, 282-289.
17. W. Kong, D. Wu, L. Xia, X. Chen, G. Li, N. Qiu, G. Chen, Z. Sun, J. You and Y. Wu, *Anal. Chim. Acta*, 2017, 973, 91-99.
18. J. Liu, X. Duan, M. Wang and X. Su, *Analyst*, 2019, 144, 7398-7405.
19. H. Ao, H. Feng, X. Huang, M. Zhao and Z. Qian, *J. Mater. Chem. C*, 2017, 5, 2826-2832.
20. M. Shi, Y. Cen, G. Xu, F. Wei, X. Xu, X. Cheng, Y. Chai, M. Sohail and Q. Hu, *Anal. Chim. Acta*, 2019, 1077, 225-231.
21. H. Zhang, Z. Wang, X. Yang, Z.-L. Li, L. Sun, J. Ma and H. Jiang, *Anal. Chim. Acta*, 2019, 1080, 170-177.
22. X. Cheng, Y. Huang, C. Yuan, K. Dai, H. Jiang and J. Ma, *Sens. Actuators, B*, 2019, 282, 838-843.
23. J. Zhang, Y. Liu, J. Lv and G. Li, *Nano Res.*, 2014, 8, 920-930.
24. H. Chen, J. Zhang, H. Wu, K. Koh and Y. Yin, *Anal. Chim. Acta*, 2015, 875, 92-98.
25. C. Zhang, C. Chen, D. Zhao, G. Kang, F. Liu, F. Yang, Y. Lu and J. Sun, *Anal. Chem.*, 2022, 94, 3485-3493.
26. G. Kang, W. Liu, F. Liu, Z. Li, X. Dong, C. Chen and Y. Lu, *Chem. Eng. J.*, 2022, 449, 137855.
